# Supplementary material for: Natural new particle formation at the coastal Antarctic site Neumayer
Source: Copernicus journal article supplement (doi:10.5194/acp-15-11399-2015), 2015-10-15
Supplement: Supplementary file 1 [file acp-15-11399-2015-supplement.zip]

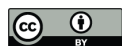

## *Supplement of*

# **Natural new particle formation at the coastal Antarctic site Neumayer**

**R. Weller et al.**

*Correspondence to:* R. Weller ([rolf.weller@awi.de](mailto:rolf.weller@awi.de))

- [acp-15-11399-2015-supplement-title-page.pdf](#)
- [CondensationParticle\\_data2012.xlsx](#)
- [CondensationParticle\\_data2014.xlsx](#)
- [Ionic\\_composition\\_data2012.xlsx](#)
- [Ionic\\_composition\\_data2014.xlsx](#)
- [Meteorological\\_data2012.xlsx](#)
- [Meteorological\\_data2014.xlsx](#)
- [SupplementaryMat\\_acp-2015-242.pdf](#)

The copyright of individual parts of the supplement might differ from the CC-BY 3.0 licence.
